# Supplementary material for: Stable oxygen isotopes of crocodilian tooth enamel allow tracking Plio-Pleistocene evolution of freshwater environments and climate in the Shungura Formation (Turkana Depression, Ethiopia)
Source: Copernicus journal article supplement (doi:10.5194/bg-2023-125), 2023-08-17
Supplement: Supplementary file 1 [file bg-2023-125-supplement.pdf]

## Supplementary information

### 1 – Age model for the Shungura Formation

This paper uses a revised age model for the Shungura Formation, interpolated based on the latest published absolute age data. The interpolation was carried out on the R.4.1.3 software, with the function `splinefun` (“stats” package, R Core Team, 2022) by implementing the data of the maximum cumulative thickness of sediments (Heinzelin and Haesarts, 1983) and the absolute ages known for some units of the Shungura Formation. For the Basal Member and the top of Member L, ages are interpolated by linear fit based on sedimentation rate. this age model is likely to evolve with the addition of new dating data.

**Table S1. The age model for the Shungura Formation, for each stratigraphic unit as a function of the maximal cumulative thickness of units. References for known absolute age are also provided in bold. Abbreviations: Magn, magnetochronology; Rad, radiochronology. Ages are given for the top of the stratigraphic units.**

| Member | Unit   | Maximal cumulative thickness | Interpolated age | Dating method | References                                              |
|--------|--------|------------------------------|------------------|---------------|---------------------------------------------------------|
| L      | L-10   | 861.5                        | 1.094            |               | Linear fit based on L sedimentation rate (L-0 to L-7)   |
|        | L-9    | 852.5                        | 1.137            |               |                                                         |
|        | L-8    | 847.3                        | 1.162            |               |                                                         |
|        | L-7    | 841.95                       | <b>1.188</b>     | Magn          | Cohen and Gibbard, 2019; Raffi et al. 2020 (Table 29.7) |
|        | L-6    | 835.3                        | 1.206            |               |                                                         |
|        | L-5    | 830.5                        | <b>1.215</b>     | Magn          | Cohen and Gibbard, 2019; Raffi et al. 2020 (Table 29.7) |
|        | L-4    | 824.9                        | 1.237            |               |                                                         |
|        | L-3    | 815.9                        | 1.295            |               |                                                         |
|        | L-2    | 808.9                        | 1.344            |               |                                                         |
|        | L-1    | 804.1                        | 1.371            |               |                                                         |
|        | Tuff L | 801.5                        | <b>1.383</b>     | Rad           | McDougall et al., 2006                                  |
| K      | K-4    | 799.5                        | 1.390            |               |                                                         |
|        | K-3    | 795.1                        | 1.400            |               |                                                         |
|        | K-2    | 787.3                        | 1.417            |               |                                                         |
|        | K-1    | 776.7                        | <b>1.485</b>     | Rad           | McDougall et al., 2006                                  |
|        | Tuff K | 773.1                        | <b>1.526</b>     | Rad           | McDougall et al., 2012                                  |
| J      | J-7    | 769.5                        | 1.556            |               |                                                         |
|        | J-6    | 765.1                        | 1.577            |               |                                                         |
|        | J-5    | 755.6                        | 1.596            |               |                                                         |
|        | J-4    | 751.6                        | <b>1.607</b>     | Rad           | McDougall et al., 2006                                  |
|        | J-3    | 744.6                        | 1.647            |               |                                                         |
|        | J-2    | 740.2                        | 1.680            |               |                                                         |
|        | J-1    | 733.8                        | 1.727            |               |                                                         |
|        | Tuff J | 727.8                        | <b>1.760</b>     | Rad           | McDougall et al., 2012                                  |
| H      | H-7    | 721.2                        | <b>1.778</b>     | Magn          | Cohen and Gibbard, 2019; Raffi et al. 2020 (Table 29.7) |
|        | H-6    | 716.4                        | 1.793            |               |                                                         |
|        | H-5    | 708.6                        | 1.823            |               |                                                         |

|         |        |              |              |                        |                                                         |
|---------|--------|--------------|--------------|------------------------|---------------------------------------------------------|
|         | H-4    | 702.6        | <b>1.843</b> | Rad                    | McDougall et al., 2006                                  |
|         | H-3    | 694.2        | 1.859        |                        |                                                         |
|         | H-2    | 686.2        | <b>1.869</b> | Rad                    | McDougall et al., 2006                                  |
|         | H-1    | 680.2        | 1.878        |                        |                                                         |
|         | Tuff H | 673.2        | 1.890        |                        |                                                         |
| Upper G | G-29   | 663.2        | 1.911        |                        |                                                         |
|         | G-28   | 654.6        | <b>1.930</b> | Magn                   | Cohen and Gibbard, 2019; Raffi et al. 2020 (Table 29.7) |
|         | G-27   | 646.2        | 1.946        |                        |                                                         |
|         | G-26   | 641.4        | 1.955        |                        |                                                         |
|         | G-25   | 635.6        | 1.966        |                        |                                                         |
|         | G-24   | 626.6        | 1.981        |                        |                                                         |
|         | G-23   | 621.6        | 1.988        |                        |                                                         |
|         | G-22   | 607.4        | 2.008        |                        |                                                         |
|         | G-21   | 603.8        | 2.013        |                        |                                                         |
|         | G-20   | 600.2        | 2.018        |                        |                                                         |
|         | G-19   | 596.8        | 2.022        |                        |                                                         |
|         | G-18   | 592.8        | 2.027        |                        |                                                         |
|         | G-17   | 587          | 2.033        |                        |                                                         |
|         | G-16   | 578.6        | 2.042        |                        |                                                         |
|         | G-15   | 574.4        | 2.047        |                        |                                                         |
| G-14    | 564    | 2.057        |              |                        |                                                         |
| Lower G | G-13   | 558.5        | 2.062        |                        |                                                         |
|         | G-12   | 538.5        | 2.081        |                        |                                                         |
|         | G-11   | 525.9        | 2.093        |                        |                                                         |
|         | G-10   | 516.3        | 2.102        |                        |                                                         |
|         | G-9    | 510.3        | 2.107        |                        |                                                         |
|         | G-8    | 506.7        | 2.111        |                        |                                                         |
|         | G-7    | 499.9        | <b>2.118</b> | Magn                   | Cohen and Gibbard, 2019; Raffi et al. 2020 (Table 29.7) |
|         | G-6    | 495.5        | 2.123        |                        |                                                         |
|         | G-5    | 488.5        | 2.131        |                        |                                                         |
|         | G-4    | 477.5        | <b>2.146</b> | Magn                   | Cohen and Gibbard, 2019; Raffi et al. 2020 (Table 29.7) |
|         | G-3    | 458.3        | <b>2.188</b> | Rad                    | McDougall and Brown, 2008                               |
| G-2     | 445.9  | 2.230        |              |                        |                                                         |
| G-1     | 441.1  | 2.247        |              |                        |                                                         |
| Tuff G  | 433.6  | <b>2.271</b> | Rad          | McDougall et al., 2012 |                                                         |
| F       | F-5    | 427.6        | 2.286        |                        |                                                         |
|         | F-4    | 424.1        | 2.293        |                        |                                                         |
|         | F-3    | 417.1        | 2.305        |                        |                                                         |
|         | F-2    | 404.1        | 2.317        |                        |                                                         |
|         | F-1    | 401.1        | 2.319        |                        |                                                         |
|         | Tuff F | 392.1        | <b>2.324</b> | Rad                    | McDougall and Brown, 2008                               |
| E       | E-5    | 384.9        | 2.328        |                        |                                                         |
|         | E-4    | 371.9        | 2.335        |                        |                                                         |
|         | E-3    | 358.9        | 2.347        |                        |                                                         |
|         | E-2    | 352.1        | 2.355        |                        |                                                         |

|                  |                  |              |              |                           |                                                         |
|------------------|------------------|--------------|--------------|---------------------------|---------------------------------------------------------|
|                  | E-1              | 344.9        | 2.367        |                           |                                                         |
|                  | Tuff E           | 338.9        | 2.378        |                           |                                                         |
| D                | D-5              | 334.9        | 2.387        |                           |                                                         |
|                  | D-4              | 322.4        | 2.422        |                           |                                                         |
|                  | Tuff D-3-2       | 316.4        | <b>2.443</b> | Rad                       | McDougall and Brown, 2008                               |
|                  | D-3              | 316.4        | <b>2.443</b> |                           |                                                         |
|                  | D-2              | 305.4        | 2.487        |                           |                                                         |
|                  | D-1              | 299.4        | 2.511        |                           |                                                         |
|                  | Tuff D           | 295.2        | <b>2.526</b> | Rad                       | McDougall and Brown, 2008                               |
| C                | C-9              | 289.8        | 2.542        |                           |                                                         |
|                  | C-8              | 279.8        | 2.568        |                           |                                                         |
|                  | C-7              | 269.2        | <b>2.603</b> | Magn                      | Cohen and Gibbard, 2019; Raffi et al. 2020 (Table 29.7) |
|                  | C-6              | 256.2        | 2.661        |                           |                                                         |
|                  | C-5              | 249.2        | 2.697        |                           |                                                         |
|                  | C-4              | 237.7        | 2.760        |                           |                                                         |
|                  | C-3              | 227.7        | 2.814        |                           |                                                         |
|                  | C-2              | 218.7        | 2.860        |                           |                                                         |
|                  | C-1              | 212.8        | 2.887        |                           |                                                         |
| Tuff C           | 205.2            | 2.918        |              |                           |                                                         |
| B                | B-12             | 199.2        | 2.937        |                           |                                                         |
|                  | B-11             | 189.2        | 2.959        |                           |                                                         |
|                  | B-10             | 181.2        | <b>2.965</b> | Rad                       | McDougall and Brown, 2008                               |
|                  | B-9              | 160.2        | 2.978        |                           |                                                         |
|                  | B-8              | 145.2        | <b>3.032</b> | Magn                      | Hilgen et al., 2012; Raffi et al. 2020 (Table 29.7)     |
|                  | B-7              | 141          | <b>3.116</b> | Magn                      | Hilgen et al., 2012; Raffi et al. 2020 (Table 29.7)     |
|                  | B-6              | 133.8        | 3.182        |                           |                                                         |
|                  | B-5              | 129.2        | 3.200        |                           |                                                         |
|                  | B-4              | 120.6        | <b>3.207</b> | Magn                      | Hilgen et al., 2012; Raffi et al. 2020 (Table 29.7)     |
|                  | B-3              | 111.6        | 3.218        |                           |                                                         |
|                  | B-2              | 107.8        | 3.229        |                           |                                                         |
|                  | B-1              | 91.8         | <b>3.330</b> | Magn                      | Hilgen et al., 2012; Raffi et al., 2020 (Table 29.7)    |
|                  | Tuff B- $\delta$ | 82.6         | <b>3.412</b> | Rad                       | McDougall et al., 2012                                  |
|                  | Tuff B- $\gamma$ | 78.8         | 3.430        |                           |                                                         |
| Tuff B- $\beta$  | 77               | 3.434        |              |                           |                                                         |
| Tuff B- $\alpha$ | 70.8             | <b>3.438</b> | Rad          | McDougall and Brown, 2008 |                                                         |
| A                | A-4              | 66.8         | 3.438        |                           |                                                         |
|                  | A-3              | 57.3         | 3.447        |                           |                                                         |
|                  | A-2              | 46.8         | 3.486        |                           |                                                         |
|                  | A-1              | 38.2         | 3.559        |                           |                                                         |

|       |        |      |              |     |                                                           |
|-------|--------|------|--------------|-----|-----------------------------------------------------------|
|       | Tuff A | 35.2 | <b>3.596</b> | Rad | McDougall and Brown, 2008                                 |
| Basal | BAS-5  | 32   | 3.610        |     | Linear fit based on A sedimentation rate (A-0 to B-alpha) |
|       | BAS-4  | 28.6 | 3.625        |     |                                                           |
|       | BAS-3  | 24.3 | 3.644        |     |                                                           |
|       | BAS-2  | 18.7 | 3.669        |     |                                                           |
|       | BAS-1  | 8.5  | 3.715        |     |                                                           |
|       |        | 0    | 3.752        |     |                                                           |

## References

- Cohen, K. M., and Gibbard, P. L.: Global chronostratigraphical correlation table for the last 2.7 million years, version 2019 QI-500. *Quat. Int.*, 500, 20-31, <https://doi.org/10.1016/j.quaint.2019.03.009>, 2019.
- Heinzelin, J. de and Haesaerts, P.: The Shungura Formation, in: The Omo Group. Archives of the International Omo Research Expedition, edited by: Heinzelin, J. de, Tervuren, 25–127, 1983.
- Hilgen, F. J., Lourens, L. J., Van Dam, J. A., Beu, A. G., Boyes, A. F., Cooper, R. A., Krijgsman, W., Ogg, J. G., Piller, W. E., and Wilson, D. S.: Chapter 29 - The Neogene Period, in: The Geologic Time Scale, edited by: Gradstein, F. M., Ogg, J. G., Schmitz, M. D., and Ogg, G. M., Elsevier, Boston, 923–978, <https://doi.org/10.1016/B978-0-444-59425-9.00029-9>, 2012.
- McDougall, I. A. N., and Brown, F. H.: Geochronology of the pre-KBS tuff sequence, Omo Group, Turkana Basin. *J Geol. Soc.*, 165, 2, 549-562, <https://doi.org/10.1144/0016-76492006-170>, 2008.
- McDougall, I., and Brown, F. H.: Precise  $^{40}\text{Ar}/^{39}\text{Ar}$  geochronology for the upper Koobi Fora Formation, Turkana basin, northern Kenya. *Journal of the Geological Society*, 163,1, 205-220, <https://doi.org/10.1144/0016-764904-166>, 2006.
- McDougall, I., Brown, F. H., Vasconcelos, P. M., Cohen, B. E., Thiede, D. S., and Buchanan, M. J.: New single crystal  $^{40}\text{Ar}/^{39}\text{Ar}$  ages improve time scale for deposition of the Omo Group, Omo–Turkana Basin, East Africa. *J Geol. Soc.*, 169(2), 213-226, <https://doi.org/10.1144/0016-76492010-188>, 2012.
- Raffi, I., Wade, B. S., Pälke, H., Beu, A. G., Cooper, R., Crundwell, M. P., Krijgsman, W., Moore, T., Raine, I., Sardella, R., and Vernyhorova, Y. V.: Chapter 29 - The Neogene Period, in: Geologic Time Scale 2020, edited by: Gradstein, F. M., Ogg, J. G., Schmitz, M. D., and Ogg, G. M., Elsevier, 1141–1215, <https://doi.org/10.1016/B978-0-12-824360-2.00029-2>, 2020.
- R Core Team: R: A language and environment for statistical computing, R Foundation for Statistical Computing., Vienna, Austria, 2022.

## 2 – Oxygen isotopic composition of crocodylian teeth

**Table S2. Information and isotopic composition of the crocodylian teeth sampled in the Shungura Formation. Abbreviation: ID, tooth inventory number; Age, age of the unit in million years.**

| <b>ID</b> | <b>Member</b> | <b>Unit</b> | <b>Morphology</b> | <b>Age</b> | <b><math>\delta^{18}\text{O}_p</math></b><br><b>(‰ V-SMOW)</b> | <b>Estimated <math>\delta^{18}\text{O}_w</math></b><br><b>(‰ V-SMOW)</b> | <b><math>\delta^{18}\text{O}_c</math></b><br><b>(‰ V-PDB)</b> |
|-----------|---------------|-------------|-------------------|------------|----------------------------------------------------------------|--------------------------------------------------------------------------|---------------------------------------------------------------|
| BsupA     | B             | B-10        | Pointed           | 2.965      | 17.02                                                          | -5.17                                                                    | -4.63                                                         |
| BsupB     | B             | B-10        | Pointed           | 2.965      | 17.95                                                          | -4.41                                                                    | -5.73                                                         |
| BsupC     | B             | B-10        | Pointed           | 2.965      | 19.09                                                          | -3.47                                                                    | -4.90                                                         |
| BsupD     | B             | B-10        | Pointed           | 2.965      | 15.32                                                          | -6.56                                                                    | -6.78                                                         |
| BsupE     | B             | B-10        | Pointed           | 2.965      | 17.68                                                          | -4.64                                                                    | -5.96                                                         |
| BsupF     | B             | B-10        | Pointed           | 2.965      | 20.8                                                           | -2.07                                                                    | -4.52                                                         |
| B10r1     | B             | B-10        | Rounded           | 2.965      | 15.79                                                          | -6.18                                                                    | -7.38                                                         |
| B10r2     | B             | B-10        | Rounded           | 2.965      | 17.48                                                          | -4.80                                                                    | -7.61                                                         |
| b10r3     | B             | B-10        | Rounded           | 2.965      | 20.66                                                          | -2.19                                                                    | -4.66                                                         |
| b10p1     | B             | B-10        | Pointed           | 2.965      | 16.37                                                          | -5.70                                                                    | -5.51                                                         |
| b10p2     | B             | B-10        | Pointed           | 2.965      | 19.76                                                          | -2.93                                                                    | -3.54                                                         |
| B10p3     | B             | B-10        | Pointed           | 2.965      | 16.22                                                          | -5.83                                                                    | -5.37                                                         |
| B10p4     | B             | B-10        | Pointed           | 2.965      | 22.22                                                          | -0.91                                                                    | -2.31                                                         |
| B10p5     | B             | B-10        | Pointed           | 2.965      | 16.98                                                          | -5.20                                                                    | -5.47                                                         |
| B10p6     | B             | B-10        | Pointed           | 2.965      | 20.48                                                          | -2.34                                                                    | -3.07                                                         |
| B10p7     | B             | B-10        | Pointed           | 2.965      | 20.41                                                          | -2.39                                                                    | -4.22                                                         |
| B10p8     | B             | B-10        | Pointed           | 2.965      | 21.31                                                          | -1.65                                                                    | 1.18                                                          |
| B10p9     | B             | B-10        | Pointed           | 2.965      | 18.29                                                          | -4.14                                                                    | -6.31                                                         |
| B10p10    | B             | B-10        | Pointed           | 2.965      | 17.26                                                          | -4.98                                                                    | -6.04                                                         |
| B10p11    | B             | B-10        | Pointed           | 2.965      | 19.53                                                          | -3.12                                                                    | -3.53                                                         |
| B12ar1    | B             | B-12a       | Rounded           | 2.937      | 19.53                                                          | -3.12                                                                    |                                                               |
| B12ar2    | B             | B-12a       | Rounded           | 2.937      | 20.2                                                           | -2.57                                                                    |                                                               |
| B12ar3    | B             | B-12a       | Rounded           | 2.937      | 18.36                                                          | -4.07                                                                    |                                                               |
| B12ar4    | B             | B-12a       | Pointed           | 2.937      | 18.73                                                          | -3.77                                                                    |                                                               |
| B12ap1    | B             | B-12a       | Pointed           | 2.937      | 18.82                                                          | -3.70                                                                    | -3.74                                                         |
| B12ap2    | B             | B-12a       | Pointed           | 2.937      | 18.6                                                           | -3.88                                                                    | -4.28                                                         |
| B12ap6    | B             | B-12a       | Pointed           | 2.937      | 20.89                                                          | -2.00                                                                    | -3.18                                                         |
| B12ap7    | B             | B-12a       | Pointed           | 2.937      | 20.35                                                          | -2.44                                                                    | -2.78                                                         |
| B12ap8    | B             | B-12a       | Pointed           | 2.937      | 19.27                                                          | -3.33                                                                    | -3.31                                                         |
| B12ap9    | B             | B-12a       | Pointed           | 2.937      | 18.04                                                          | -4.34                                                                    | -4.81                                                         |
| B12ap10   | B             | B-12a       | Pointed           | 2.937      | 18.4                                                           | -4.05                                                                    | -8.16                                                         |
| B12ap11   | B             | B-12a       | Pointed           | 2.937      | 18.78                                                          | -3.73                                                                    | -5.72                                                         |
| B12ap12   | B             | B-12a       | Pointed           | 2.937      | 19.43                                                          | -3.19                                                                    | -5.67                                                         |
| B12ap13   | B             | B-12a       | Pointed           | 2.937      | 20.08                                                          | -2.66                                                                    | -3.98                                                         |

|         |   |       |         |       |       |       |       |
|---------|---|-------|---------|-------|-------|-------|-------|
| B12ap14 | B | B-12a | Pointed | 2.937 | 19.01 | -3.54 | -5.82 |
| B12ap15 | B | B-12a | Pointed | 2.937 | 18.4  | -4.04 | -5.04 |
| B12ap16 | B | B-12a | Pointed | 2.937 | 17.92 | -4.44 | -5.94 |
| B12br1  | B | B-12b | Rounded | 2.937 | 17.56 | -4.73 |       |
| B12br2  | B | B-12b | Rounded | 2.937 | 17.9  | -4.46 |       |
| B12br3  | B | B-12b | Rounded | 2.937 | 18.19 | -4.22 |       |
| B12br4  | B | B-12b | Rounded | 2.937 | 17.86 | -4.48 |       |
| B12br5  | B | B-12b | Rounded | 2.937 | 18.4  | -4.04 |       |
| B12bp1  | B | B-12b | Pointed | 2.937 | 18.09 | -4.30 | -5.33 |
| B12bp2  | B | B-12b | Pointed | 2.937 | 18.58 | -3.89 |       |
| B12bp3  | B | B-12b | Pointed | 2.937 | 18.53 | -3.94 | -5.19 |
| B12bp4  | B | B-12b | Pointed | 2.937 | 18.59 | -3.88 | -4.84 |
| B12bp5  | B | B-12b | Pointed | 2.937 | 18.08 | -4.30 | -6.85 |
| B12bp6  | B | B-12b | Pointed | 2.937 | 18.96 | -3.59 | -6.48 |
| B12bp7  | B | B-12b | Pointed | 2.937 | 18.85 | -3.67 | -5.54 |
| B12bp8  | B | B-12b | Pointed | 2.937 | 18.6  | -3.88 | -6.43 |
| B12bp9  | B | B-12b | Pointed | 2.937 | 18.75 | -3.76 | -5.87 |
| B12bp10 | B | B-12b | Pointed | 2.937 | 18.21 | -4.20 | -5.02 |
| B12bp11 | B | B-12b | Pointed | 2.937 | 18.4  | -4.04 | -5.13 |
| B12bp12 | B | B-12b | Pointed | 2.937 | 16.85 | -5.31 | -5.96 |
| B12bp13 | B | B-12b | Pointed | 2.937 | 17.04 | -5.16 | -6.59 |
| B12bp14 | B | B-12b | Pointed | 2.937 | 17.33 | -4.92 | -6.01 |
| B12bp15 | B | B-12b | Pointed | 2.937 | 18.02 | -4.35 | -5.78 |
| C2p1    | C | C-2   | Pointed | 2.86  | 17.47 | -4.81 | -5.36 |
| C2p2    | C | C-2   | Pointed | 2.86  | 18.25 | -4.16 |       |
| C2p3    | C | C-2   | Pointed | 2.86  | 17.76 | -4.57 |       |
| C2p4    | C | C-2   | Pointed | 2.86  | 17.39 | -4.87 |       |
| C2p5    | C | C-2   | Pointed | 2.86  | 17.13 | -5.08 |       |
| C2p6    | C | C-2   | Pointed | 2.86  | 19.07 | -3.49 |       |
| C2p7    | C | C-2   | Pointed | 2.86  | 17.77 | -4.56 |       |
| C2p8    | C | C-2   | Pointed | 2.86  | 18.83 | -3.69 |       |
| C2p9    | C | C-2   | Pointed | 2.86  | 18.28 | -4.14 |       |
| C2p10   | C | C-2   | Pointed | 2.86  | 18.78 | -3.73 |       |
| C2p11   | C | C-2   | Pointed | 2.86  | 17.09 | -5.12 |       |
| C2p12   | C | C-2   | Pointed | 2.86  | 18.4  | -4.04 |       |
| C2p13   | C | C-2   | Pointed | 2.86  | 19.7  | -2.98 |       |
| C2p14   | C | C-2   | Pointed | 2.86  | 16.59 | -5.53 |       |
| C2p15   | C | C-2   | Pointed | 2.86  | 16.97 | -5.22 |       |
| C2p16   | C | C-2   | Pointed | 2.86  | 15.84 | -6.14 |       |

|              |   |     |         |       |       |       |       |
|--------------|---|-----|---------|-------|-------|-------|-------|
| C2p17        | C | C-2 | Pointed | 2.86  | 18.26 | -4.15 |       |
| C2p18        | C | C-2 | Pointed | 2.86  | 19.09 | -3.48 |       |
| C2p19        | C | C-2 | Pointed | 2.86  | 19.22 | -3.37 |       |
| C2p20        | C | C-2 | Pointed | 2.86  | 16.77 | -5.38 |       |
| C4r1-bisC4r6 | C | C-4 | Rounded | 2.76  | 20.26 | -2.52 | -5.01 |
| C4r2         | C | C-4 | Rounded | 2.76  | 16.12 | -5.91 | -6.87 |
| C4r4-bisC4r7 | C | C-4 | Rounded | 2.76  | 17.77 | -4.56 | -5.32 |
| C4r5         | C | C-4 | Rounded | 2.76  | 15.87 | -6.12 | -6.65 |
| C4p1         | C | C-4 | Pointed | 2.76  | 18.77 | -3.74 |       |
| C4p2         | C | C-4 | Pointed | 2.76  | 20.17 | -2.59 |       |
| C4p3         | C | C-4 | Pointed | 2.76  | 19.49 | -3.15 |       |
| C4p4         | C | C-4 | Pointed | 2.76  | 18.66 | -3.83 |       |
| C4p5         | C | C-4 | Pointed | 2.76  | 17.98 | -4.39 |       |
| C4p6         | C | C-4 | Pointed | 2.76  | 17.22 | -5.01 |       |
| C4p7         | C | C-4 | Pointed | 2.76  | 20.07 | -2.67 |       |
| C4p8         | C | C-4 | Pointed | 2.76  | 19.08 | -3.48 |       |
| C4p9         | C | C-4 | Pointed | 2.76  | 17.63 | -4.67 |       |
| C4p10        | C | C-4 | Pointed | 2.76  | 20.11 | -2.64 |       |
| C8ar1        | C | C-8 | Rounded | 2.568 | 21.08 | -1.84 |       |
| C8ar2        | C | C-8 | Rounded | 2.568 | 18.06 | -4.32 |       |
| C8ar3        | C | C-8 | Rounded | 2.568 | 18.17 | -4.23 |       |
| C8ar4        | C | C-8 | Rounded | 2.568 | 18.3  | -4.13 |       |
| C8ar5        | C | C-8 | Rounded | 2.568 | 17.45 | -4.82 |       |
| C8ap1        | C | C-8 | Pointed | 2.568 | 16.84 | -5.32 |       |
| C8ap2        | C | C-8 | Pointed | 2.568 | 15.68 | -6.27 |       |
| C8ap3        | C | C-8 | Pointed | 2.568 | 16.94 | -5.24 |       |
| C8ap4        | C | C-8 | Pointed | 2.568 | 18.83 | -3.69 |       |
| C8ap5        | C | C-8 | Pointed | 2.568 | 18.56 | -3.91 |       |
| C8rA         | C | C-8 | Rounded | 2.568 | 16.69 | -5.45 |       |
| C8rB         | C | C-8 | Rounded | 2.568 | 20.18 | -2.58 | -3.72 |
| C8rC         | C | C-8 | Rounded | 2.568 | 17.18 | -5.04 |       |
| C8rD         | C | C-8 | Rounded | 2.568 | 17.38 | -4.88 |       |
| C8rE         | C | C-8 | Rounded | 2.568 | 17.72 | -4.60 |       |
| C8rF         | C | C-8 | Rounded | 2.568 | 19.7  | -2.98 |       |
| C8rG         | C | C-8 | Rounded | 2.568 | 19.33 | -3.28 |       |
| C8rH         | C | C-8 | Rounded | 2.568 | 20.24 | -2.54 |       |
| C8rI         | C | C-8 | Rounded | 2.568 | 19.93 | -2.79 |       |
| C8rJ         | C | C-8 | Rounded | 2.568 | 17.54 | -4.75 |       |
| C8rK         | C | C-8 | Rounded | 2.568 | 17.35 | -4.91 |       |

|         |   |     |         |       |       |       |       |
|---------|---|-----|---------|-------|-------|-------|-------|
| C8rL    | C | C-8 | Rounded | 2.568 | 17.52 | -4.77 |       |
| C8rN    | C | C-8 | Rounded | 2.568 | 16.2  | -5.84 |       |
| C8rO    | C | C-8 | Rounded | 2.568 | 17.65 | -4.65 |       |
| C8pA    | C | C-8 | Pointed | 2.568 | 18.12 | -4.27 |       |
| C8pB    | C | C-8 | Pointed | 2.568 | 16.25 | -5.80 |       |
| C8pC    | C | C-8 | Pointed | 2.568 | 16.75 | -5.40 |       |
| C8pD    | C | C-8 | Pointed | 2.568 | 17.23 | -5.00 |       |
| C8pE    | C | C-8 | Pointed | 2.568 | 17.09 | -5.11 |       |
| C8pF    | C | C-8 | Pointed | 2.568 | 17.71 | -4.61 |       |
| C8pG    | C | C-8 | Pointed | 2.568 | 17.45 | -4.82 |       |
| C8pH    | C | C-8 | Pointed | 2.568 | 17.24 | -4.99 |       |
| C8pI    | C | C-8 | Pointed | 2.568 | 20.95 | -1.95 |       |
| C8pJ    | C | C-8 | Pointed | 2.568 | 18.19 | -4.22 |       |
| C8pK    | C | C-8 | Pointed | 2.568 | 15.11 | -6.74 |       |
| C8pL    | C | C-8 | Pointed | 2.568 | 17.99 | -4.37 |       |
| C8pM    | C | C-8 | Pointed | 2.568 | 19.82 | -2.88 |       |
| C8pN    | C | C-8 | Pointed | 2.568 | 16.13 | -5.90 |       |
| C8pO    | C | C-8 | Pointed | 2.568 | 16.13 | -5.90 |       |
| F1-5-r1 | F | F-1 | Rounded | 2.319 | 17.57 | -4.72 | -4.88 |
| F1-5-r2 | F | F-1 | Rounded | 2.319 | 18.21 | -4.20 | -4.02 |
| F1-5-r3 | F | F-1 | Rounded | 2.319 | 18.97 | -3.57 | -3.48 |
| F1-5-p1 | F | F-1 | Pointed | 2.319 | 18.24 | -4.17 | -4.31 |
| F1-5-p2 | F | F-1 | Pointed | 2.319 | 18.95 | -3.59 | -4.00 |
| F1-5-p3 | F | F-1 | Pointed | 2.319 | 16.46 | -5.63 | -5.24 |
| F2-1r1  | F | F-2 | Rounded | 2.317 | 19.34 | -3.27 | -3.67 |
| F2-1r2  | F | F-2 | Rounded | 2.317 | 20.17 | -2.59 |       |
| F2-1r3  | F | F-2 | Rounded | 2.317 | 20.07 | -2.67 | -4.43 |
| F2-1r4  | F | F-2 | Rounded | 2.317 | 16.92 | -5.25 | -8.07 |
| F2-1r5  | F | F-2 | Rounded | 2.317 | 20.6  | -2.23 | -4.54 |
| F2-1r6  | F | F-2 | Rounded | 2.317 | 20.87 | -2.01 | -4.56 |
| F2-1r7  | F | F-2 | Rounded | 2.317 | 20.62 | -2.22 |       |
| F2-1r8  | F | F-2 | Rounded | 2.317 | 19.86 | -2.84 | -4.42 |
| F2-1r9  | F | F-2 | Rounded | 2.317 | 18.83 | -3.69 |       |
| F2-1p1  | F | F-2 | Pointed | 2.317 | 19.39 | -3.23 |       |
| F2-1p2  | F | F-2 | Pointed | 2.317 | 19.64 | -3.03 |       |
| F2-1p3  | F | F-2 | Rounded | 2.317 | 18.98 | -3.56 | -4.66 |
| F2-1p4  | F | F-2 | Rounded | 2.317 | 19.39 | -3.23 |       |
| F2-1p5  | F | F-2 | Rounded | 2.317 | 20.41 | -2.40 | -3.90 |
| F2-1pA  | F | F-2 | Pointed | 2.317 | 19.33 | -3.28 |       |



|        |      |           |         |       |       |       |       |
|--------|------|-----------|---------|-------|-------|-------|-------|
| F2-1pB | F    | F-2       | Pointed | 2.317 | 16.57 | -5.54 |       |
| F2-1pC | F    | F-2       | Pointed | 2.317 | 18.86 | -3.67 |       |
| F2-1pD | F    | F-2       | Pointed | 2.317 | 19.72 | -2.96 |       |
| F2-1pE | F    | F-2       | Pointed | 2.317 | 20.21 | -2.56 |       |
| F2-1pF | F    | F-2       | Pointed | 2.317 | 19.31 | -3.30 |       |
| G3r1   | Ginf | G-03      | Rounded | 2.188 | 16.07 | -5.95 |       |
| G3p1   | Ginf | G-03      | Pointed | 2.188 | 16.1  | -5.93 |       |
| G3p2   | Ginf | G-03      | Pointed | 2.188 | 16.63 | -5.49 |       |
| G3p3   | Ginf | G-03      | Pointed | 2.188 | 18.04 | -4.34 |       |
| G3p4   | Ginf | G-03      | Pointed | 2.188 | 16.91 | -5.26 |       |
| G24r1  | Gsup | G-24      | Rounded | 1.981 | 20.75 | -2.12 |       |
| G24r2  | Gsup | G-24      | Rounded | 1.981 | 20.29 | -2.49 |       |
| G24r3  | Gsup | G-24      | Rounded | 1.981 | 21.12 | -1.81 |       |
| G24p1  | Gsup | G-24      | Pointed | 1.981 | 20.94 | -1.96 |       |
| G24p2  | Gsup | G-24      | Pointed | 1.981 | 21.04 | -1.88 |       |
| G24p3  | Gsup | G-24      | Rounded | 1.981 | 19.4  | -3.22 |       |
| G24p4  | Gsup | G-24      | Pointed | 1.981 | 20.57 | -2.26 |       |
| G24p5  | Gsup | G-24      | Pointed | 1.981 | 20.01 | -2.72 |       |
| G24p6  | Gsup | G-24      | Pointed | 1.981 | 19.94 | -2.78 |       |
| G24p7  | Gsup | G-24      | Pointed | 1.981 | 20.89 | -2.00 |       |
| G24p8  | Gsup | G-24      | Pointed | 1.981 | 19.81 | -2.88 |       |
| G24p9  | Gsup | G-24      | Pointed | 1.981 | 19.84 | -2.86 |       |
| G24p10 | Gsup | G-24      | Pointed | 1.981 | 20.42 | -2.38 |       |
| G24p11 | Gsup | G-24      | Pointed | 1.981 | 20.21 | -2.56 |       |
| G24pA  | Gsup | G-24      | Pointed | 1.981 | 21.28 | -1.68 |       |
| G24pB  | Gsup | G-24      | Pointed | 1.981 | 19.48 | -3.16 |       |
| G24pC  | Gsup | G-24      | Pointed | 1.981 | 19.57 | -3.08 |       |
| G24pD  | Gsup | G-24      | Pointed | 1.981 | 19.72 | -2.96 |       |
| G24pE  | Gsup | G-24      | Pointed | 1.981 | 20.26 | -2.52 |       |
| G24pF  | Gsup | G-24      | Pointed | 1.981 | 20    | -2.73 |       |
| Gsupr1 | Gsup | G-27_G-28 | Rounded | 1.946 | 20.48 | -2.34 | -2.21 |
| Gsupr2 | Gsup | G-27_G-28 | Rounded | 1.946 | 16.01 | -6.00 | -5.96 |
| Gsupr3 | Gsup | G-27_G-28 | Rounded | 1.946 | 16.57 | -5.54 | -4.91 |
| Gsupr4 | Gsup | G-27_G-28 | Rounded | 1.946 | 18.82 | -3.70 | -3.42 |
| Gsupp1 | Gsup | G-27_G-28 | Pointed | 1.946 | 17.06 | -5.14 | -4.69 |
| Gsupp2 | Gsup | G-27_G-28 | Pointed | 1.946 | 19.68 | -2.99 | -3.26 |
| Gsupp3 | Gsup | G-27_G-28 | Pointed | 1.946 | 16.8  | -5.35 | -5.03 |
| Gsupp4 | Gsup | G-27_G-28 | Pointed | 1.946 | 18.69 | -3.80 | -3.35 |
| Gsupp5 | Gsup | G-27_G-28 | Pointed | 1.946 | 17.63 | -4.67 | -4.22 |

|         |   |         |         |       |       |       |       |
|---------|---|---------|---------|-------|-------|-------|-------|
| H4-H5r1 | H | H-4_H-5 | Rounded | 1.843 | 17.04 | -5.16 |       |
| H4-H5p1 | H | H-4_H-5 | Pointed | 1.843 | 17.87 | -4.48 |       |
| H4-H5p2 | H | H-4_H-5 | Pointed | 1.843 | 18.48 | -3.98 |       |
| H4-H5p3 | H | H-4_H-5 | Pointed | 1.843 | 17.1  | -5.11 |       |
| H4-H5p4 | H | H-4_H-5 | Pointed | 1.843 | 20.99 | -1.92 |       |
| H4-H5p5 | H | H-4_H-5 | Pointed | 1.843 | 16.29 | -5.77 |       |
| K4p1    | K | K-4     | Pointed | 1.39  | 22.93 | -0.33 |       |
| K4p2    | K | K-4     | Pointed | 1.39  | 21.23 | -1.72 |       |
| K4p3    | K | K-4     | Pointed | 1.39  | 18.06 | -4.32 |       |
| L2p1    | L | L-2     | Pointed | 1.344 | 19.83 | -2.87 |       |
| L2p2    | L | L-2     | Pointed | 1.344 | 20    | -2.73 |       |
| L2p3    | L | L-2     | Pointed | 1.344 | 20.13 | -2.63 |       |
| L2p4    | L | L-2     | Pointed | 1.344 | 20.45 | -2.36 |       |
| L2p5    | L | L-2     | Pointed | 1.344 | 19.79 | -2.90 |       |
| L2p6    | L | L-2     | Pointed | 1.344 | 19.96 | -2.77 |       |
| L2p7    | L | L-2     | Pointed | 1.344 | 19.73 | -2.95 |       |
| L2p8    | L | L-2     | Pointed | 1.344 | 20.78 | -2.09 |       |
| L2p9    | L | L-2     | Pointed | 1.344 | 19.67 | -3.00 |       |
| L2p10   | L | L-2     | Pointed | 1.344 | 20.06 | -2.68 |       |
| L2p11   | L | L-2     | Pointed | 1.344 | 19.37 | -3.25 |       |
| L2p12   | L | L-2     | Pointed | 1.344 | 20.49 | -2.33 |       |
| L2p13   | L | L-2     | Pointed | 1.344 | 20.78 | -2.09 |       |
| L2p14   | L | L-2     | Pointed | 1.344 | 20.1  | -2.65 |       |
| L4A     | L | L-2     | Pointed | 1.344 | 20.6  | -2.24 |       |
| L4B     | L | L-2     | Pointed | 1.344 | 20.05 | -2.69 |       |
| L4C     | L | L-2     | Pointed | 1.344 | 20.75 | -2.11 |       |
| L4D     | L | L-2     | Pointed | 1.344 | 18.99 | -3.56 |       |
| L4E     | L | L-2     | Pointed | 1.344 | 20.35 | -2.45 |       |
| L4F     | L | L-2     | Pointed | 1.344 | 20.54 | -2.29 |       |
| L3p1    | L | L-3     | Pointed | 1.295 | 19.25 | -3.35 | -2.91 |
| L3p2    | L | L-3     | Pointed | 1.295 | 20.13 | -2.62 | -2.63 |
| L3p3    | L | L-3     | Pointed | 1.295 | 19.38 | -3.24 | -3.92 |
| L3p5    | L | L-3     | Pointed | 1.295 | 19.07 | -3.49 | -3.18 |
| L3p6    | L | L-3     | Pointed | 1.295 | 19.62 | -3.04 | -3.46 |
| L4p1    | L | L-4     | Pointed | 1.237 | 19.28 | -3.32 | -2.58 |
| L4p2    | L | L-4     | Pointed | 1.237 | 19.63 | -3.03 | -3.11 |
| L4p3    | L | L-4     | Pointed | 1.237 | 19.34 | -3.27 | -4.22 |
| L4p4    | L | L-4     | Pointed | 1.237 | 21    | -1.91 | -2.83 |
| L4p5    | L | L-4     | Pointed | 1.237 | 20.2  | -2.57 | -1.78 |

|      |   |     |         |       |       |       |       |
|------|---|-----|---------|-------|-------|-------|-------|
| L9r1 | L | L-9 | Rounded | 1.137 | 20.32 | -2.47 | -0.95 |
| L9r2 | L | L-9 | Rounded | 1.137 | 18.55 | -3.92 |       |
| L9r3 | L | L-9 | Rounded | 1.137 | 20.15 | -2.61 | -2.07 |
| L9r4 | L | L-9 | Rounded | 1.137 | 20.51 | -2.31 | -2.56 |
| L9r5 | L | L-9 | Rounded | 1.137 | 19.08 | -3.48 | -2.58 |
| L9r6 | L | L-9 | Rounded | 1.137 | 19.14 | -3.44 | -3.11 |
| L9r7 | L | L-9 | Rounded | 1.137 | 20.04 | -2.70 | -2.86 |
| L9r8 | L | L-9 | Rounded | 1.137 | 19.86 | -2.84 | -1.41 |
| L9r9 | L | L-9 | Rounded | 1.137 | 20.95 | -1.95 | -0.89 |

35

**Table S3. Pairwise comparison of the  $\delta^{18}\text{O}_p$  between units (Wilcoxon Rank Sum Tests with Holm correction – Significance:  $p < 0.05$ , \*,  $p < 0.01$ , \*\*,  $p < 0.001$ , \*\*\*).**

| Horizons  | B-10 | B-12a | B-12b | C-2 | C-4 | C-8 | F-1 | F-2 | G-3 | G-24 | G-27/G-28 | H-4/H-5 | K-4 | L-2 | L-3 | L-4 |
|-----------|------|-------|-------|-----|-----|-----|-----|-----|-----|------|-----------|---------|-----|-----|-----|-----|
| B-12a     |      |       |       |     |     |     |     |     |     |      |           |         |     |     |     |     |
| B-12b     |      |       |       |     |     |     |     |     |     |      |           |         |     |     |     |     |
| C-2       |      |       |       |     |     |     |     |     |     |      |           |         |     |     |     |     |
| C-4       |      |       |       |     |     |     |     |     |     |      |           |         |     |     |     |     |
| C-8       |      |       |       |     |     |     |     |     |     |      |           |         |     |     |     |     |
| F-1       |      |       |       |     |     |     |     |     |     |      |           |         |     |     |     |     |
| F-2       |      |       |       |     |     |     |     |     |     |      |           |         |     |     |     |     |
| G-3       |      |       |       |     |     |     |     |     |     |      |           |         |     |     |     |     |
| G-24      |      | *     | ***   | *** |     | *** | *** |     | *** |      |           |         |     |     |     |     |
| G-27/G-28 |      |       |       |     |     |     |     |     |     | *    |           |         |     |     |     |     |
| H-4/H-5   |      |       |       |     |     |     |     |     |     |      |           |         |     |     |     |     |
| K-4       |      |       |       |     |     |     |     |     |     |      |           |         |     |     |     |     |
| L-2       |      |       | ***   | *** |     | *** | *   |     |     |      |           |         |     |     |     |     |
| L-3       |      |       |       |     |     |     |     |     |     |      |           |         |     |     |     |     |
| L-4       |      |       |       | *   |     |     |     |     |     |      |           |         |     |     |     |     |
| L-9       |      | *     | *     |     |     |     |     |     |     |      |           |         |     |     |     |     |

40
